# Supplementary material for: Highly activated oxygen redox enabling large-capacity Li-rich layered manganese-based oxide cathodes
Source: Royal Society of Chemistry journal article supplement (doi:10.1039/d3cp01935g), 2023-01-01
Supplement: d3cp01935g1.pdf [file d3cp01935g1.pdf]

## Supporting Information

### Highly Activated Oxygen Redox Enabling Large-capacity Li-rich Layered Manganese-Based Oxide Cathode

Table S1. ICP results of the LLMO-L2, LLMO-L3, and LLMO-L5 samples

| <i>Samples</i>             | Li     | Ni     | Co     | Mn     |
|----------------------------|--------|--------|--------|--------|
| LLMO811(Theoretical value) | 0.60   | 0.16   | 0.02   | 0.22   |
| LLMO811-L2                 | 0.5557 | 0.1814 | 0.0214 | 0.2415 |
| LLMO811-L3                 | 0.5575 | 0.1807 | 0.0213 | 0.2405 |
| LLMO811-L5                 | 0.6311 | 0.1477 | 0.0244 | 0.1968 |

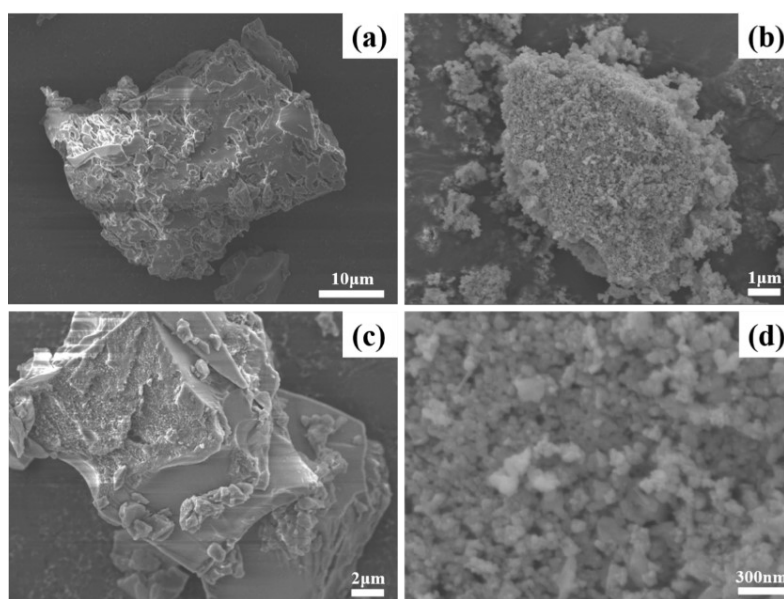

Figure S1. SEM images of the LLMO-L3 precursor before (a, c) and after pyrolysis (b, d).

Table S2. Cell parameters of samples with different amounts of excess lithium

| <i>Samples</i> | <i>a</i> (Å) | <i>c</i> (Å) | <i>V</i> (Å <sup>3</sup> ) | <i>c/a</i> |
|----------------|--------------|--------------|----------------------------|------------|
| LLMO-L2        | 2.8712       | 14.2538      | 101.77Å <sup>3</sup>       | 4.9644     |
| LLMO-L3        | 2.8701       | 14.2533      | 101.73Å <sup>3</sup>       | 4.9661     |

|         |        |         |                     |        |
|---------|--------|---------|---------------------|--------|
| LLMO-L5 | 2.8704 | 14.2251 | 101.5Å <sup>3</sup> | 4.9558 |
|---------|--------|---------|---------------------|--------|

Table S3.  $I_{(003)}/I_{(104)}$  ratio of samples with different amounts of excess lithium

| <i>Samples</i> | $I_{(003)}$ | $I_{(004)}$ | $I_{(003)}/I_{(004)}$ |
|----------------|-------------|-------------|-----------------------|
| LLMO-L2        | 9207        | 3889        | 2.3674                |
| LLMO-L3        | 6497        | 2978        | 2.1817                |
| LLMO-L5        | 7130        | 3123        | 2.2831                |

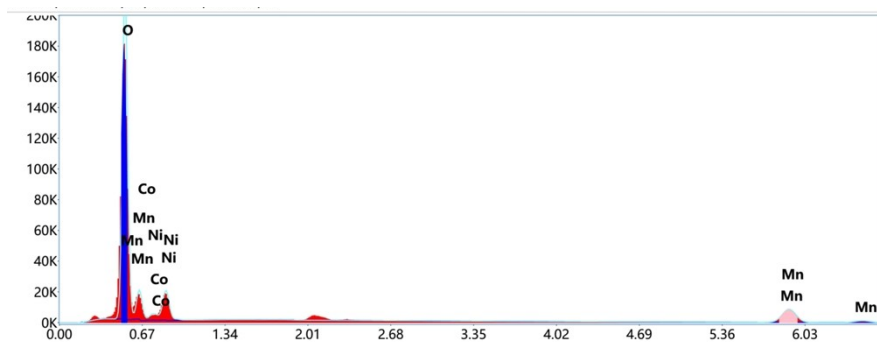

Figure S2. EDS element distribution curve

Table S4. The proportion of each element calculated from EDS

| <i>Element</i> | <b>Weight %</b> | <b>MDL</b> | <b>Atomic %</b> |
|----------------|-----------------|------------|-----------------|
| O              | 30.4            | 0.04       | 60.5            |
| Mn             | 37.8            | 0.35       | 21.9            |
| Co             | 3.4             | 0.50       | 1.8             |
| Ni             | 27.6            | 0.68       | 14.9            |

Table S5 Electrochemical properties of samples with different amounts of excess lithium

| <i>Samples</i>                    | <b>LLMO-L2</b> | <b>LLMO-L3</b> | <b>LLMO-L5</b> |
|-----------------------------------|----------------|----------------|----------------|
| ICE                               | 82.9%          | 83.8%          | 82.2%          |
| Capacity Retention (80 Cycles)    | 78.8%          | 79.3%          | 77.9%          |
| Capacity Reversibility (5C to 1C) | 97.0%          | 97.2%          | 97.3%          |
| Voltage Decay (80 Cycles)         | 86.7%          | 84.1%          | 88.1%          |

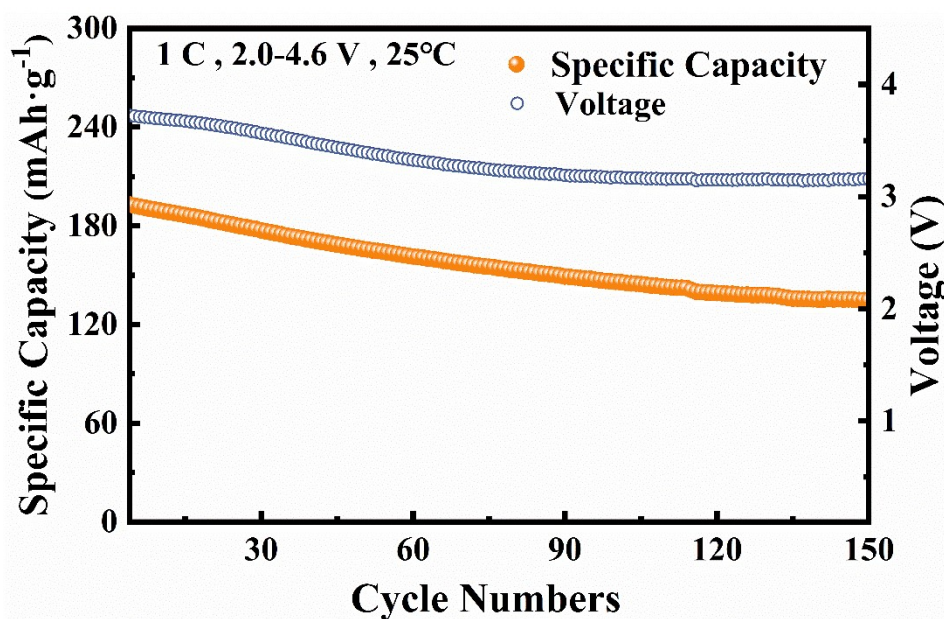

Figure S3. The cycling performance of LLMO-L3 at 1C

Table S6 O atomic percentage calculated by fitting the XPS peaks at different voltage states

| <i>Samples</i>  | <b>M-O</b> | <b>C=O</b> | <b>C-O</b> | <b>O<sup>-</sup>/O<sub>2</sub><sup>2-</sup></b> |
|-----------------|------------|------------|------------|-------------------------------------------------|
| original sample | 41.1%      | 58.9%      | 0          | 0                                               |
| 1st-4.0         | 0          | 61.6%      | 38.4%      | 0                                               |
| 1st-4.8         | 13.7%      | 41.0%      | 31.9%      | 13.4%                                           |
| 1st-3.5         | 11.8%      | 68.4%      | 19.8%      | 0                                               |
| 1st-2.0         | 0          | 61.1%      | 38.9%      | 0                                               |
| 2nd-4.6         | 11.9%      | 41.5%      | 30.1%      | 16.5%                                           |

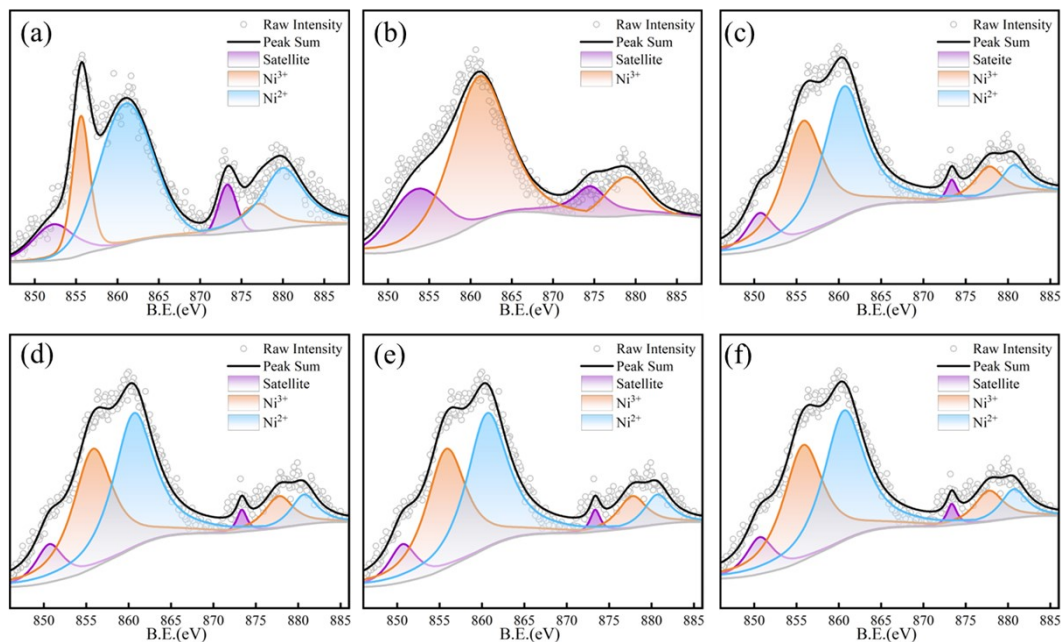

Figure S4. Ni 2p spectra of LLMO-L3 at different voltage points. (a) pristine electrode, (b) 1st-4.0, (c) 1st-4.8, (d) 1st-3.5, (e) 1st-2.0, (f) 2nd-4.6

Table S7. Cell parameters of LLMO-L3 at different voltage

| <i>Samples</i> | <i>a</i> (Å) | <i>c</i> (Å) | <i>V</i> (Å <sup>3</sup> ) | <i>c/a</i> |
|----------------|--------------|--------------|----------------------------|------------|
| LLMO-L3        | 2.8701       | 14.2533      | 101.73Å <sup>3</sup>       | 4.9661     |
| 1st-4.0V       | 2.8580       | 14.1530      | 100.12Å <sup>3</sup>       | 4.9521     |
| 1st-4.8V       | 2.8661       | 14.5747      | 103.11Å <sup>3</sup>       | 5.0852     |
| 1st-3.5V       | 2.8826       | 14.3844      | 103.51Å <sup>3</sup>       | 4.9901     |
| 1st-2.0V       | 2.8587       | 14.2445      | 100.95Å <sup>3</sup>       | 4.9828     |
